1 **The potential role of cultural and religious healing practices in shaping community**  
2 **vulnerability to highly infectious diseases in western Kenya**

3 *Naomi Nga'ng'a<sup>1</sup>, Reuben Onkoba Momanyi<sup>1</sup>, Caleb Chemirmir<sup>1</sup>, Hazael Biwott<sup>1</sup>, George*  
4 *Ayodo<sup>2</sup>, Monica Orero<sup>1</sup>, Damaris Ochanda<sup>4</sup>, Sarah Ngere<sup>3</sup>, Winnie Ogola<sup>1</sup>, Tutus*  
5 *Murundu<sup>1</sup>, Geoffrey Munene<sup>1</sup>, Zachary Misiani<sup>1</sup>, Michael Ayaibei<sup>1</sup> and Richard Dimba*  
6 *Kiaka<sup>2</sup>*

7 1. *Kenya Red Cross Society*

8 2. *Jaramogi Oginga Odinga University of Science and Technology (JOOUST)*

9 3. *Kenya Medical Research Institute (KEMRI)*

10 4. *Masinde Muliro University of Science and Technology (MMUST)*

11 *Corresponding Author*

12 *Naomi Ng'ang'a, Email: [naomingash4@gmail.com](mailto:naomingash4@gmail.com)*

13 *All authors contributed equally to this work.*

14 **Abstract**

15 We draw from empirical research conducted in communities in three border counties in western  
16 Kenya – Homa Bay, Bungoma and West Pokot - to examine how cultural and religious beliefs  
17 and healing practices can potentially shape the vulnerability of those communities to highly  
18 infectious diseases. Fieldwork consisting of mixed methods namely, key informant interviews with  
19 traditional and religious healers as well as their patients, focus group discussions with community  
20 members knowledgeable on cultural customs and practices, and participatory inquiry workshops  
21 with health professionals and administrators were used to collect the data.

22 We find that traditional and religious beliefs and healing practices potentially shape community  
23 vulnerability to highly infectious diseases in two major ways. First, is a dualistic illness etiology  
24 involving a biomedical and socio-cultural etiology. Unexplained illnesses and illnesses that did  
25 not respond to conventional medicine were treated using traditional medicine. Making traditional  
26 and religious healers the first mile treatment preference could potentially delay appropriate  
27 treatment and compromise safe handling in case the disease is highly infectious. Second aspect  
28 pertains to the risks in the traditional and spiritual healing practices. Shared consecrated water  
29 often fetched from a large water body, laying of hands, use of herbs and rituals involving  
30 slaughtering of animals enhanced contacts. The use of protective gears during healing was  
31 inconsistent among the healers, but largely lacking as many healers could not afford them or were  
32 considered to reduce patient's faith in the healing powers. These practices potentially predispose  
33 people to highly infectious diseases and can hasten the spread and symptom severity. To reduce  
34 the vulnerability of border communities to highly infectious diseases, we argue for a need for  
35 comprehensive strategies that consider the intersecting factors of vulnerability to outbreaks,  
36 healing beliefs and practices. This may involve policy initiatives aimed at integrating traditional  
37 medicine practice and the mainstream health system.

38 **Keywords:** Traditional healing, religious healing, looping effect, community vulnerability, highly  
39 infectious diseases, western Kenya.

## 40 **Introduction**

41 Cultural and religious practices and beliefs around the world have significant influence on  
42 the management of outbreaks of infectious diseases, where swift response and effective  
43 control of the diseases is required (McMichael 2004; Manderson 1998; Borg 2014). While  
44 some cultural and religious beliefs and practices can complement effective response to  
45 and management of highly infectious diseases (Rodriguez-Dod et. al. 2016; Victor and  
46 Ahmed 2019), others inspire health seeking behaviors that can be counterproductive to  
47 interventions. This has been exacerbated especially in situations where the well-intended  
48 interventions by emergency organizations and governments are in disconnect with  
49 communities' cultural practices of seeking health and responding to epidemics. Recent  
50 examples such as response to COVID-19 (Alwala 2020; Oey and Rahardjo 2021; Okafor  
51 2022; Lucy et. al. 2022) and Ebola Virus Disease (EVD) (Shultz et al. 2016; Park 2020)  
52 offer relevant testimonies to the conflicts between communities and government's  
53 interventions to manage the infectious diseases. The containment of these highly  
54 contagious diseases require stringent measures that interfere with the daily activities of  
55 the members of the communities including, for example, restricting social interactions and  
56 movements of people, and suspending important cultural ceremonies and rituals (Alwala  
57 2020). Through policy actions such as movement restrictions (or lock-down), government  
58 safe burial procedures amongst others, governments and other health emergency  
59 organizations take control of aspects of people's lives that is normally a preserve of  
60 cultural and religious doctrines. Communities can often violate or resist these intervention  
61 measures that tend to challenge the role of culture and religions in people's lives. Whether

62 the resistance is active or passive, it constrains government's interventions, thereby  
63 compromising health outcomes.

64 Blaming and victimizing cultures and religions of communities for the contradictions that  
65 emerge in these emergency health interventions is common (Jones 2011; Wona 2018).  
66 Governments often see the traditions, especially those they consider to be unique, to be  
67 an impediment to health interventions during outbreaks of highly infectious diseases  
68 (Kipiriri and Ross 2020). These policy attitudes only help to recast the conflicts between  
69 formal interventions with cultural practices. Medical anthropologists have asserted that it  
70 is imperative to consider very actively the way local cultures interact with the concept of  
71 health, if we are to make any significant reconciliation between our formal health  
72 interventions and cultural practices around health (Airhihenbuwa et al. 2014; Manson  
73 2020). That is, before asking a community to assume particular health habits, it is  
74 necessary to ascertain the existing health habits of the people and the interlinkages  
75 between those habits, their functions and the meanings they inspire amongst the people  
76 practicing them (Chiavo 2013). Such an approach will require a more radical paradigm  
77 shift from top-down health interventions to a more community centered-approach, where  
78 local health behaviors and how they are rationalized by the community members are at  
79 the core of analysis. Importantly, studies should consider understanding how the cultural  
80 practices shape and are shaped by formal health interventions, especially in the context  
81 of highly infectious diseases when socio-economic aspects of the communities are often  
82 under pressure and health resources are overstretched.

83 Many communities across Africa use non-biomedical treatments to promote health,  
84 including herbal medicine preparations and spiritual healing (Harrison and Airhihenbuwa

85 2018; Adu and Anderson 2019). Reasons could range from lack of adequate access to  
86 health facilities, high costs of biomedical treatments and traditional and religious beliefs  
87 around diseases and health. Even with the rising promotion of western medicine, the use  
88 of traditional and religious healing has remained an important source of health for many  
89 communities to the extent that the traditional and religious healers are the first stop for  
90 many people in health-seeking for highly infectious diseases like EVD (de-Vries et al.  
91 2016). Experience from Africa has shown that when disease intervention programs fail to  
92 recognize and work with indigenous beliefs and practices, they also remain largely  
93 ineffective and miss their goals (Geissler 2005; Boahen 2013). The World Health  
94 Organization (WHO) in its *Traditional Medicine Strategy 2014 – 2023* has emphasized  
95 the global importance of these alternative approaches to health (WHO 2103). In recent  
96 decades, research in medical anthropology, sociology and other social health sciences  
97 have promoted broader approaches that accommodate non-western health-seeking. That  
98 is, they embrace a shift from rejecting cultural and traditional health beliefs and practices  
99 to understanding that culturally rooted, traditional healing approaches are valued and  
100 used by many people often in combination with biomedical approaches. In order to  
101 understand why infectious diseases programs are not working and endeavor to provide  
102 solutions, research and interventions must consider the culturally embedded health  
103 seeking behaviors.

104 Drawing on fieldwork conducted in selected communities in western Kenya, we undertake  
105 an analysis of how some traditional and religious beliefs intersect with the concepts of  
106 disease, health and healing. First, we examine the factors that shape health related-  
107 beliefs and practices, including seeking healing from traditional and religious healers. We

108 then analyze how the practices can influence management of highly infectious disease  
109 including community preparedness, response, surveillance and control of highly  
110 infectious diseases. We borrow the concept of looping effect to argue that through cultural  
111 or religious beliefs and practices, communities form loops with the bio-physical disease,  
112 so as to redefine meanings of treatment and overall goal of good health. Considering that  
113 highly infectious diseases spread very fast and therefore require swift interventions,  
114 grounds the value of evaluating those loops to broaden and sharpen an understanding of  
115 the barriers and enablers of cultural knowledge and behaviors in preparedness, planning  
116 and execution of emergency response in times of outbreaks of highly infectious diseases,  
117 which still falls short of the mark in many epidemics management programs.

118 We proceed to describe our theoretical framework where we situate our work in the  
119 literature in medical and cultural anthropology, as well as cultural psychology that have  
120 applied the concept of looping effect in understanding how culture shapes health  
121 behaviours and associated diseases epidemiology. Next, we describe the methodology  
122 including a description of the study sites and data collection and analysis methods. We  
123 then present our findings and discuss them in light of their implications to scholarship,  
124 policies and the practices for intervening on highly infectious diseases outbreaks. We  
125 finally draw some conclusions and suggest some recommendations.

126 **Analytical framework/theoretical framework**

127 Our contribution in this paper pays close attention to the social and behavioral aspects of  
128 infectious diseases within communities where non-western cultures and religions strongly  
129 mediate social life and understanding of health. We therefore tap from the theoretical  
130 inspirations from medical anthropology and cultural psychology to attend to the questions  
131 of how culture, mind and biology interrelate within the domain of infectious diseases  
132 management (Schaller and Murray 2010). Community experience and response to highly  
133 infectious diseases can be enmeshed in the sociocultural beliefs and practices that  
134 mediate their interaction with the physical and metaphysical world (Schaller and Murray  
135 2010). In particular, the social transmission of highly infectious diseases means that their  
136 spread, and hence their impact on a community, is driven in part by social behaviors  
137 which, in turn, are shaped by patterns of culturally shared beliefs in that community (Baye  
138 et al. 2021). We particularly draw from the conceptual insights of *looping effect*, originally  
139 coined by Hacking (1995, 2007), to analyze how the interrelations between cultural beliefs  
140 or practices and psychological processes can inspire certain behaviors and responses  
141 towards highly infectious diseases in ways that have implications on disease control and  
142 the disease itself (Kirmayer and Sartorius, 2007; Ryder and Chentsova-Dutton, 2015).  
143 That people in a community can choose to employ traditional and religious healing in  
144 response to highly infectious diseases does not hinge on a conceptual or cognitive  
145 vacuum. Rather, their choice for health-seeking behaviours are a result of various kinds  
146 of socially embedded knowledge in the unique cultural and historical settings they inhabit.  
147 Hacking calls this process ‘dynamic nominalism’ through which cultural institutions, social  
148 contexts, and socially embedded knowledge produce various kinds of looping effects to



149 the biology of diseases (Hacking 2007). With this framework, we connect how religious  
150 and traditional healing becomes a preference in communities we studied, and how the  
151 health-seeking behaviour can form looping effects with highly infectious diseases and  
152 responses to them. Therefore, instead of seeing culture – the metaphysics, and disease-  
153 causing pathogens – the physical as two parallel existences, the looping effect allows us  
154 to analyze the indirect mutual interaction between the two worlds (Baye et al. 2021).  
155 Looping effect considers that while people’s beliefs “do not intervene directly on the virus  
156 itself and are not so clearly implicated in the core symptoms of the infection” they can  
157 change important features of the highly infectious diseases such as infection rate, severity  
158 of infection and tolerance and resistance to drugs through virus mutations” (Baye et al.  
159 2021:3).

160 In advancing this thought, we consider that three cultural and psychological aspects of  
161 highly infectious diseases can create a looping effect with the biology of the diseases.  
162 These three aspects include diseases etiology, treatment responses and perceptions on  
163 institutional responses. Etiology is concerned with how people conjure diseases, including  
164 how they give meanings to their existence or causality. What people believe to be the  
165 cause of a disease will determine their response to the disease (Balde 2016). Many  
166 African communities are endowed with cultural repositories of knowledge and  
167 experiences from which they draw meanings of diseases and their causes. These can  
168 range from metaphysical, relational and environmental causes. Individuals in the  
169 community will seek-health for diseases in a manner commensurate to causes of those  
170 diseases. Secondly, health-seeking behaviours can inspire diverse implications on  
171 societal responses to an outbreak, including delaying appropriate treatment, weakening

172 surveillance and reporting, enhancing spread and severity. These can further make the  
173 pathogen to be resistant to treatments. We use the concept of looping to address two  
174 questions. 1). How can traditional and religious beliefs and associated practices form a  
175 looping effect with highly infectious diseases and their treatments? 2). What implications  
176 can they have on the effective management of the disease and ensuring good health in  
177 case of disease outbreak?

178 **Methodology**

179 **Study settings**

180 Fieldwork conducted in western Kenya in the counties of Homa Bay, Bungoma, and West  
181 Pokot. In the context of highly infectious diseases, the three counties share a porous  
182 border with neighboring Uganda and Tanzania which have in recent times seen outbreaks  
183 of Ebola Virus Disease (Kinsman 2012; Kozlov 2022) and Malburg (Deb et al. 2023)  
184 respectively. Homa Bay County has also struggled with multiple outbreaks of cholera in  
185 recent years.<sup>1</sup> Moreover, these counties are characterized by strong traditional belief  
186 systems that influence health seeking behaviour (Chebii et al., 2020; Kwanya, 2020;  
187 Mbuithia et al., 2018; Otieno and Onyango, 2018). There is also a persistent practice of  
188 unique religious beliefs including deifying humans and asserting that healing can possibly  
189 be achieved through faith and religious rituals e.g. in Bungoma. These religious beliefs  
190 influence health seeking for communities in ways that impinge on management of highly  
191 infectious diseases, including EVD. Lastly and equally important, these counties were  
192 selected for surveillance and health education by a national taskforce on EBVD following  
193 the 2022 outbreak in Uganda.

---

<sup>1</sup> See for example <https://www.kenyanews.go.ke/cholera-cases-in-homa-bay-county-on-the-rise/> and <https://www.standardmedia.co.ke/health/health-science/article/2001473552/cholera-outbreak-one-person-dead-73-hospitalised-in-homa-bay>

194 **Methods**

195 Fieldwork was conducted between September and November 2023. Qualitative data was  
196 collected using a combination of methods including key informant interviews (KIIs), focus  
197 group discussions (FGDs) and participatory inquiry workshops. KIIs guides were  
198 developed and administered a constitution of a less structured, open-ended set of  
199 questions organized in pre-identified thematic areas. A total of 45 were conducted  
200 including traditional healers (13) and religious healers (16) and their respective patients  
201 (16) in each of the counties. Participants were identified through chain referrals.  
202 Interviews were conducted within health facilities or respondents' homes depending on  
203 the comfort of the respondent. Interviews were conducted in a language that the  
204 respondent was most comfortable with. Whereas in West Pokot county the interviews  
205 were translated, in Homa Bay and Bungoma, the researchers were able to directly  
206 conduct interviews in Dholuo and Swahili respectively.

207 FGD guides were semi-structured providing respondents with the flexibility to express  
208 their opinions. A total of 6 FGDs each (8-12 participants) were conducted with community  
209 members in the three counties. Each FGD was of a homogenous gender in that women  
210 FGD was separated from Men FGD. Respondents were brought to a central point where  
211 sessions were conducted. The FGDs investigated a set of issues on sociocultural and  
212 religious healthcare seeking on highly infectious diseases. In Homabay Dholuo was used  
213 to facilitate the discussions, in Bungoma Swahili was used to facilitate the discussions  
214 and lastly in West Pokot a translator assisted the moderator to translate questions into  
215 Pokot.

216 Participatory inquiry workshops were used to collect data and information from  
217 stakeholders of public health promotion stakeholders in each county. These stakeholders  
218 included government public health officers, NGOs and CBOs, Community Health  
219 Promoters (CHPs) and national administration officers – chiefs. The workshop was  
220 conducted in central locations. Participants were divided into groups depending on their  
221 category. Each group had a moderator and a note taker. They were given a list of  
222 questions to discuss and generate detailed group responses. After about an hour of group  
223 discussions, participants gathered in a plenary to discuss their points. Points were  
224 interrogated by participants and adjustments made as was relevant and agreeable to  
225 participants.

226 All discussions from KIIs, FGDs and participatory inquiry workshops were audio recorded  
227 and transcribed verbatim into English. The framework method was employed to analyze  
228 the data, using both inductive and deductive coding. The authors jointly developed a  
229 coding framework that was jointly developed and formulated into a spreadsheet matrix  
230 that contained numerous themes and sub-themes under which relevant excerpts from the  
231 transcripts were entered. Irrelevant codes were deleted while adding emergent codes to  
232 the matrix as needed. Transcripts were read again and again to ensure that coding was  
233 done exhaustively and also checked for consistency. Emerging themes were collated,  
234 collapsed, defined and interpreted as results.

## 235 **Ethics Statement**

236 Ethical approval No. MMUST/IERC/185/2023 was granted by the Masinde Muliro  
237 University Institutional Scientific Ethics Review Committee (MMUST-ISERC).

238 Respondents' informed consent were sought in writing before interviews. Under the  
239 informed consents the respondents were provided with all the pertinent information about  
240 the study to guide them in making a decision on whether to participate in the study or not.  
241 The information provided in the consent forms included: the purpose of the study, the  
242 procedures to be followed; and the benefits/risks of this study. There was no foreseen  
243 harm to the participants however, participation in the study was completely voluntary, and  
244 respondents' confidentiality has been maintained such that no information in the  
245 processed data and publications can lead to the identity of an informant. Data collection  
246 took 3 days in each of the 3 counties, where in Homabay the team collected data between  
247 25<sup>th</sup>-27<sup>th</sup> September while in Bungoma and west Pokot data collection was conducted  
248 between 11<sup>th</sup>- 13<sup>th</sup> October 2023.

249 **Results**

250 **Traditional and religious illness and healing beliefs**

251 *Beliefs on causes of illness*

252 There exists a dualistic illness etiology in Homa Bay County, Bungoma and West Pokot  
253 County. Both traditional and religious (especially those from African Instituted Churches)  
254 spheres in the county consider diseases to be associated with biomedical and  
255 sociocultural causes. Using a biomedical lens to explain disease etiology, religious and  
256 traditional healers, their patients and participants of FGDs associated some diseases to  
257 viruses, bacteria and dirt and poor hygiene. For example, cholera was associated with  
258 poor sanitation, while the COVID-19 was mentioned to be caused by coronavirus. A  
259 respondent elaborates below how to prevent diarrheal diseases

260 *These infectious diseases are diarrhea and vomiting. When you hear that there is*  
261 *an outbreak of diarrhea in Luanda that means that it has already spread to these*  
262 *parts of Ang'iya. If you hear about a cholera outbreak in Luanda, people are*  
263 *advised to boil drinking water we fetch from the lake, eat clean food, eat well*  
264 *cooked food, don't take cold meals and no open defecation, use the toilet. Wash*  
265 *your hands after going to the toilet and dry your hands with tissue paper and throw*  
266 *it in the toilet. When you throw the tissue paper outside and not in the toilet, it helps*  
267 *to spread the disease.*

268 *Religious Healer KII4, Homa Bay*

269 Socio-cultural illness etiology is largely associated with customs and beliefs. Witchcraft  
270 was mentioned as one of the causes of illness. Witchcraft distinguishing signs are diverse  
271 but largely associated with abnormal illness such as mental disorder, bloody vomit,  
272 severe headaches and severe stomach aches. Among discussants in a Focus Group one  
273 of the respondents says that:

274 *...then for example when a child is looked at badly (evil eye) with a witch(iro), then*  
275 *he is taken to the hospital and injected, he will not be well. So some people believe*  
276 *if I run to the religious healer, they will be well*

277 *FGD2, Homabay*

278 A respondent explains elaborately how a child can get sick from an 'evil eye' in the excerpt  
279 below. It is believed that diseases caused by an 'evil eye' or witchcraft cannot be treated  
280 in the hospital also referred to as *non-hospital diseases*. *Non-hospital* cases are treated  
281 by either traditional medicine or by religious healers. The rationale is that if the disease is  
282 treated in the hospital the sick person will not recover from the sickness.

283 *For example, there is a particular illness that forces you to go for that type of*  
284 *treatment. When someone looks at a child who is breastfeeding with bad eyes; so*  
285 *there are people with bad eyes that will make this milk turn into something else in*  
286 *this child's stomach. So a hospital won't help you in this case. So there are people*  
287 *who can scratch the bad milk from inside the child (saro) hence this traditional*  
288 *healers, there are places where they come in handy like such not that they don't*  
289 *help completely.*



290 *FGD2, Homa bay*

291 Disease etiology is also arrived at when a particular disease does not respond as quickly  
292 as desired to biomedical treatment. Sometimes when traditional or religious healing is  
293 sought, the rationale is driven by non-response to biomedical treatment. Those diseases  
294 that take too long to recover are believed to be caused by the power of *satan*. The *satanic*  
295 forces are believed to be inflicted by humans in a way of punishing the inflicted person/or  
296 when they are envious of the person. In Homa bay a respondent stated that:

297 *A sickness that has been treated and has taken even 3 months and it is still*  
298 *that one sickness, it goes and comes back and goes and comes back that*  
299 *now shows that satan is in there so we have to pray to God.*

300 *Religious Healer KII1, Homa bay*

301 A patient of a religious healer from Bungoma believes that she was not responding to  
302 biomedical treatment because her illness was inflicted by an 'evil eye'. The respondent  
303 believed that an envious person cast a spell of bad luck on them and made them severely  
304 ill with a disease that did not respond to conventional medicine.

305 *What I can say is "hasad" someone is not happy with your progress and*  
306 *looks at you with an evil eye because they are not happy with your growth.*  
307 *"Hasad" is bad luck.*

308 *Patient of a religious healer KII2, Bungoma*

309 In West Pokot a respondent attribute illness causation to supernatural forces that is  
310 caused by supernatural forces emanating from the river. When a respondent was asked  
311 what causes pneumonia their response was as illustrated below.

312 *This disease originates if you cross rivers with supernatural thunders as we*  
313 *were told long time ago. And sure this supernatural being are there because*  
314 *if you cross the river and it doesn't like you it will throw some soil at you.*  
315 *Last year it attacked some of our children in River chematong where they*  
316 *droned and they were searched for a very long time until one of the person*  
317 *identified them and for sure this supernatural thunders may exist.*

318 *Traditional Healer KII3, West Pokot*

319 Some respondents believe that the departure from indigenous traditions such as their  
320 traditional food practices is causing the community illnesses. They believe that the food  
321 they consume currently makes them susceptible to illnesses.

322 *In the past people never used to get sick from these illnesses they used to take*  
323 *this vegetable called mhalaha, it helped their body to be strong, the soup from the*  
324 *cattle heads, they never used to be sick, they used to eat traditional food and now*  
325 *we eat meat from treated cattle, they put chemicals in milk we drink and the*  
326 *diseases are caused by these things*

327 *FGD1, Bungoma*

328 Traditional medicines are believed to protect someone from illnesses failure of using  
329 these drugs are causing illnesses in people.

330 *If you are used to taking traditional medicine, it is very hard for you to contract the*  
331 *diseases because the medicine washes all the blood veins you cannot get*  
332 *infectious disease. It helps you. FGD1, Bungoma*

333 *Traditional and religious healing beliefs*

334 Traditional,religious and spiritual beliefs were noted to offer support and meaning to those  
335 coping with health challenges. Most of our respondents who went to traditional or/and  
336 religious healers were comforted and reassured of healing especially in instances where  
337 conventional treatment failed. In religious healing, faith was paramount for healing to take  
338 place.

339 *What I can say is that I had faith because I knew that when I go there/I did not*  
340 *have a second thought. I did not have that; I knew if I go to the hospital I will get*  
341 *help. But I did not think about what if the Imam comes and pray or read the Quran*  
342 *is when I will get healed, I knew that if I go to the hospital I will get healed. So when*  
343 *I was tired of going to the hospital I told myself to try God may be God will help. So*  
344 *I had faith and asked him to come and pray for me and also I pray for myself maybe*  
345 *through God everything will be fine.*

346 *Patient of a religious healer KII2, Bungoma*

347 Depending on the individual one may choose traditional or religious healing.

348 *The traditional healers are there hence they treat illnesses that can't be treated in*  
349 *the hospital, very many illnesses defeat doctors in the hospital hence the traditional*

350 *doctors are the ones that clear them and once you take your patient there, they*  
351 *begin to drink porridge and they start speaking.*

352 *Patient of traditional healer KII4, Bungoma.*

353 In Christianity the doctrines in these churches emphasize the possibility of God giving  
354 healing powers to members of the congregation. They receive the healing powers through  
355 the holy spirit. Although the doctrines may differ in some areas, these churches share  
356 foundational beliefs in some diseases occurring because of curses, sins of witchcraft.  
357 Diseases associated with these cultural processes were reported by religious healers to  
358 be often associated with strange signs and symptoms that are diverse. One respondent  
359 states that God heals because everything happens in his power and therefore healing  
360 also comes from him.

361 *Everything happens through the power of the holy spirit or God. We believe in*  
362 *prayers and the Religious Healer can pray and we believe through the strength of*  
363 *Jesus Christ the patient is healed.*

364

365 *Patient of a religious healer KII2, Homa bay*

366 The religious healer therefore becomes the vehicle in which healing is performed but God  
367 is the healer as stated by a Bungoma respondent

368 *We do not say that somebody heals, it is God who heals not an individual. Maybe*  
369 *there is that bit of a praying, there is that bit of reading the verses of the Quran to*  
370 *get that healing from God.*

371 *Patient of a religious healer KII2, Bungoma*

372 The Christian religious healers, largely consist of African Instituted Churches e.g., *Roho*  
373 and *Legio Maria* churches. These churches combine Christian teachings with Luo  
374 customs to advance spirituality. Therefore, it is no wonder that some traditional healers  
375 mentioned that some religious healers refer patients to them to collect medicines for the  
376 further treatment and cultural advice or send to the hospital for further treatment.  
377 Religious healers who were interviewed believe that their powers come from God. It is  
378 from these powers that they are able to discern *hospital* and *non-hospital* illness and refer  
379 accordingly.

380

381 *God gave me some gift that by just seeing you the way we have sat and when I*  
382 *just start praying for you, I get a vision of what's going on with you and even in*  
383 *your family. So that's why I have to do the checking (diagnosis)for me to know the*  
384 *disease was caused in this way and what brought it. And if it happens that the*  
385 *disease was caused by a human, then we will pray to God. But if it's just a disease*  
386 *which have just come up, then I will send you to the hospital.*

387 *Religious Healers KII5, Homa Bay*

388 Religious healers are cognizant of the extent of their ability to treat diseases. Using their  
389 judgment and powers given by God traditional healers use a combination of spiritual  
390 healing and traditional medicine. In other cases, they refer their patients to the hospital  
391 especially for infectious diseases because they appreciate the severity of the disease.

392            *The patient was weak and had persistent cough accompanied by pain in the lungs.*  
393            *When he came, I prayed for him and after one week, I sent her to the hospital to*  
394            *check, the tests showed he had no TB.*

395            *Religious Healer KII3, West Pokot*

## 396    **Traditional and religious healing practices**

### 397    *Religious healing practices*

398    Religious healing involves rituals that are accompanied by prayer, laying of hands and  
399    consecration of the body using *holy water*. According to religious healers and their  
400    patients who were interviewed, *holy water* can be sourced through different means.  
401    Communities living near large water bodies such as the ones from Homa bay, water  
402    bodies and their water are significant in healing practices. the practice include fetching  
403    water from Lake Victoria boiling and consecrating it through prayer by a religious leader  
404    with healing powers. *Holy water* can also be drawn from water bodies with religious  
405    significance or mythical in Luo cultural cosmologies. A religious healer from Homabay  
406    explains how she prepares *holy water* in the excerpt below:

407            *we boil the water as we pray asking God to bless the water to turn into medicine.*  
408            *So, when I sprinkle in his body you see the body shakes. It sends away the devil.*  
409            *So ill pray for you that way and after that you'll be healed and taken by your family*  
410            *members*

411            *Religious healer KII6, Homabay*

412 In Islam the religious practice involved citation of specific Quran verses, burning incense  
413 and praying over the sick person. This ritual is repeated until the sick person recovers.

414 *The prayers happened in our home but the first time he burnt incense in his home*  
415 *and my father did the same, he is also a Maalim. It's just incense, while reading*  
416 *the Quran.* Patient of a religious healer KII2, Bungoma

417 In West Pokot religious healing involves prayers only, the religious healer lay their hands  
418 on the sick person and if they have faith in God then they are healed..

419 Some processes of administering healing that were mentioned involved body washing,  
420 where the healer washes the patient's body using *holy water* or is washed using a cocktail  
421 of herbs mixed with water. The processes involve direct body contact between the healer  
422 and the patient.

423 *when they come, I will boil that water as I pray vehemently and after that, I first*  
424 *wash them with it after adding salt into it and a bit of sugar to stop the bleeding*  
425 *and can be done three or four times then drinks. He begins to urinate the infections*  
426 *like they urinate blood. At that time, I'll be praying as I am washing him until the*  
427 *minute he arises.* Religious Healer KII6, Homabay

#### 428 **Traditional healing practices**

429 Traditional healers in Homa Bay, Bungoma and West Pokot County are similar and  
430 diverse in nature. In the 3 counties they differ depending on their specialty on the kind of  
431 diseases they treat. There are those dealing with broken bones and displaced joints,  
432 some deal only with mental disorders, others deal with snake bites. There are those who

433 deal with diseases associated with witchcraft, while others deal with diseases that are  
434 clinical in nature such as measles, asthma, stomach aches etc. Healing for diseases  
435 associated with witchcraft and those that are clinical in nature are the ones that have  
436 direct implications on management of highly infectious diseases. A patient of a traditional  
437 healer explains how he was treated when he could not find treatment for an illness that  
438 was associated to socio-cultural etiology.

439 The treatment included traditionally cutting through the flesh (*chanja*) and inserting herbal  
440 medicine.

441 *Because he saw my body swelling, my leg swelling, my chest swelling, he just*  
442 *started making small cuts and inserting medicines and those medicine that got into*  
443 *my body, made me feel pain when they were entering hence from there, it just took*  
444 *me one week and I started seeing my body going back to normal, he started from*  
445 *there then he gave me another one for drinking and I got well after also the herbs*  
446 *which he cut into my body.*

447 *Patient of traditional healer KII4, Bungoma*

448 Traditional healers also treat illnesses that can be bio medically defined such as malaria,  
449 Typhoid, TB, hepatitis B, sexually transmitted infections and many others. They report  
450 that they are able to know what disease the patient has by report from patient, observation  
451 of symptoms or palpating the patient. The herbs used are used to specifically treat certain  
452 ailments. The treatments are sometimes accompanied by rituals such as slaughtering an  
453 animal. In the excerpt from West Pokot below the patient was 'diagnosed' with an STI,



454 the treatment included using herbal medication and slaughtering a goat to be part of the  
455 treatment process.

456 *I gave them 'Yowoo' a herb called 'yowoo' which she would go and boil for herself*  
457 *at her home. Also I gave a herb called 'Kelkelowo' for sexually transmitted*  
458 *diseases. It is those two herbs that she can use but for those who are going to*  
459 *slaughter a goat, they will combine 'songogoghwo','manampellion' 'cheporion'.*  
460 *These herbs can be mixed with soup boiled from goat meat. I also instructed her*  
461 *to come back again after some time to examine the blood level because I saw*  
462 *there may be less blood level. She should come back in order to see if the low*  
463 *blood level has retained or it has returned to normal.*

464 ***Traditional healer KII3, West Pokot***

465 Special ritual is made for protection against diseases in the recent past the communities  
466 of West Pokot were cleansed for protection against COVID 19. The ritual involves  
467 slaughtering a cow and burning it. Herbal medication is prepared and drunk in order to  
468 protect them from the illness.

469  
470 *...during cleansing we curse these diseases so they can't continue they*  
471 *stop there. So, the cleansing is like slaughtering a cow and burn it. Then there are*  
472 *drugs we take, there are others we drink and pour so the diseases don't come to*  
473 *us in our village.*

474 *FGD2, West Pokot*

475 ***The practice of administering healing***

476 Some processes of administering healing that were mentioned to be having the risks of  
477 predisposing healers and patients to infection included body washing, where the patient  
478 washes the body or is washed using a cocktail of herbs mixed with water. The processes  
479 involve direct body contact between the healer and the patient, inhalation, where the  
480 patient inhales medicines under a blanket. The blanket is often used by other patients as  
481 well; piercing or cutting skin or veins to suck out what was termed as “*bad blood*”, with  
482 the high risks of creating direct contact with patients’ body fluids; laying of hands by  
483 religious healers during prayers for the patient, which leads to direct body contact;  
484 sprinkling of holy water and medicine on the body of the patient. In some cases, the  
485 healers drink the medicine and hold it in their mouths from which they sprinkle to the face  
486 of the patient; and massaging the patient either while praying or applying medicine. In  
487 relation to highly infectious diseases, these processes share one thing in common – the  
488 contact with the body or body fluids which has the potential of enhancing the spread of  
489 viruses and other disease-causing pathogens.

490 *What happens is after dying, we as 3 female healers wash the body clean so that*  
491 *we avoid spread of diseases to those who come and had no idea what they were*  
492 *suffering from. When the others come, we advise them to avoid touching the*  
493 *person because they were sick.*

494 *Religious healer KII3, Homabay*

495 *The practice of handling waste*

496 Interview data show that religious and traditional healers do not have the necessary  
497 knowledge and capacity to handle patients’ wastes. These wastes include vomit, blood,

498 sputum, faecal matter, and general dirt from clothes. When asked how they dumped the  
499 wastes, most traditional healers mentioned that they dump them into a pit latrine in their  
500 compounds or bury them into the soil. Others dump or wash the wastes in water bodies  
501 that are communally used in the communities e.g., the lake, rivers, or water ponds. For  
502 example, when the traditional healer, was asked how he cleans the blankets that he uses  
503 to provide inhalation treatment to his patients, he said:

504 *My wife must wash them in the lake. I also keep them in my house because it's*  
505 *never anything threatening that can cause serious issues in the event the blankets*  
506 *are stored in the house or anything that has the potential of affecting my children*

507 Traditional healer KII6, Homabay

508 This example demonstrates lack of knowledge and capacity of handling waste from  
509 patients, as pathogens causing highly infectious diseases can leak through the poor  
510 waste-handling practices into the community leading to widespread infection and  
511 overstretched management measures.

### 512 *Healing paraphernalia*

513 Traditional and religious healing have many paraphernalia depending on the kind of  
514 treatment given. These can range from containers for bathing, containers for drinking  
515 medicines, sharp objects for cutting or piercing the skin; blankets for inhalation; etc.  
516 Participants reported that there was widespread sharing of healing paraphernalia e.g.,  
517 the same basin or bucket for bathing patients or the one calabash for drinking medicines  
518 by different patients and the same blanket for inhalation processes. Healers justified the  
519 sharing of paraphernalia in many ways namely, that it is cumbersome for patients to be  
26

520 bringing their own materials as they come for healing services; and that some of the  
521 paraphernalia are consecrated or spiritually dedicated for use and this is also central to  
522 the healing of a patient. Sharing of healing paraphernalia has the risks of passing  
523 infections from one patient to another.

524 However, other healers asked the patients to bring their own personal effects like basin,  
525 cups and plates for use during their stay as reported in the excerpt below:

526 *aside, yes, he/she vomits there when it is done you tell their people now wash,*  
527 *they will bring their basin, if they come I tell them to buy their basin and utensils*  
528 *they will use to eat. He stayed three weeks and he was healed.*

529 *Traditional healer KII1, West Pokot*

530 The preparation, storage and administration of the medicines demonstrate poor  
531 observation of hygiene. For example, traditional healer, described one of how he does  
532 his healing processes in the following manner:

533 *Yes, once you're seated here and these used to belong to my grandfather. I then*  
534 *take the hoe and detach it from the handle together with a new broom [.....]. Once*  
535 *I have it, I then instruct my client to open his/her mouth, then the medicine moves*  
536 *from the broom to the hoe and lands in the mouth*

537 *Traditional healer KII6, Homabay*

538 **Patient handling**

539 Traditional and religious healers are generally not trained in patient handling. They rely  
540 on their experience with various illness and patients. While their experience might be  
541 sufficient for the healthcare they give, their safety and that of their patients are not  
542 guaranteed. Most religious and traditional leaders as well as their patients mentioned  
543 that the healers usually do not use personal protective equipment (PPE) such as gloves,  
544 masks, and aprons. They handle their patients with bare hands and without protection  
545 against coughs, sneezing and spillage of body fluids such as blood. This predisposes  
546 them to highly infectious diseases in case their patients would be suffering from one.  
547 Some reasons were mentioned to be contributing to the lack of personal equipment were.  
548 First, some healers mentioned that they could not afford gloves, masks, aprons, and  
549 sterilizing agents, since they usually charge little money for their services or receive  
550 payment in kind. Another reason was the lack of knowledge that a disease could be highly  
551 infectious. Education and strategic awareness creation could help address this problem.  
552 A third reason was the need to demonstrate faith and power over ailments. This was  
553 especially true for some religious healers. The interview excerpt below helps to illustrate  
554 this point:

555 *For church members to bring a sick person to you as a religious healer, this means*  
556 *they have a strong faith in you. You can't tell a patient to keep distance or wear a*  
557 *mask so that you can pray for them because automatically they will lose hope, that*  
558 *strong faith they came with in you. For you to pray for a sick person you have to*  
559 *touch them with bare hands, and you don't have instruments, the protective*  
560 *measure you have is you have to wash your hands with running water afterwards*

561 *Religious healer KII3, Homabay*

562 For the religious healer, handling patients without necessary protection is meant to  
563 sustain the faith of the patient, which is an integral part of the healing process. Wearing  
564 and using protective clothing or equipment reduces the faith of the patient hence can  
565 compromise healing. However, this demonstration of spiritual faith leads to direct body  
566 contact that can be counterproductive in case the patients or the healers had EVD or  
567 other highly infectious diseases like COVID-19. It creates physical and social chains  
568 through which the diseases can spread through communities to reach pandemic levels.

569 The risks posed by failure to use PPE during traditional and religious healing was known  
570 to some participants. For example, some patients were aware that when a traditional or  
571 a religious healer handles them without PPE, then they can be predisposed to infections,  
572 especially of highly infectious diseases. To help illustrate this point, we consider response  
573 by a former patient of a traditional healer in the interview excerpt below:

574 *Yes, it would spread fast because she was handling me without gloves, gumboots,*  
575 *masks, she just put on her normal clothes, she had no apron the way nurses*  
576 *usually have one when delivering a baby, all these would have facilitated the*  
577 *spread of this disease.*

578 *Patient of a traditional healer KII3, Homabay*

579 Some traditional healers reported using PPEs in their healing activities. For example, a  
580 traditional birth attendant mentioned that she wears gloves when massaging pregnant  
581 women and when they accidentally come on labour and give birth at their homes she

582 ensured that the birthing conditions was clean The interview excerpt below helps to  
583 illustrate this point:

584 *You must have clean water and soap for washing hands before and after. The*  
585 *patient also has to be clean. The days we used to assist mothers to give birth,*  
586 *when cutting the umbilical cord, someone can give birth to a baby who is not very*  
587 *clean, so you have to wash your hands properly.*

588 *Traditional Healer KII1, Homabay*

589 These relatively safe practices were reported to be as result of the collaboration between  
590 public health facilities and traditional birth attendants in the county. That the traditional  
591 birth attendant in the excerpt above intentionally ensures cleanliness and personal  
592 protection for herself and the patient is a good sign that increased awareness and  
593 education about safety during patient care can be fruitful endeavour.

## 594 **Discussion, conclusion and recommendations**

595 Social, cultural and religious forces have historically influenced patterns of disease  
596 exposure, health-seeking behaviours, reporting of cases and the uptake of interventions.  
597 (Buckee et al., 2021). In particular, for highly infectious diseases, culturally mediated  
598 behaviors have been observed to partly shape transmission in populations which are  
599 socially organized by those cultures (Baye et al., 2021). Theoretically, cultural beliefs and  
600 practices, and health-seeking behaviours that they inspire connect with highly infectious  
601 diseases through a looping effect, leading to serious implications on outbreak prevention  
602 and response (Hacking 1995; 2007). This paper has considered traditional and religious  
603 beliefs and practices that mediate people's response to highly infectious diseases in  
604 western Kenya and shown how looping effects emerge from those culture disease  
605 interactions.

606 The analysis reveals a dualistic diseases etiology, in that causes of diseases were  
607 associated with a mix of biomedical and sociocultural factors. The dual diseases etiology  
608 shapes two kinds of diseases – hospital diseases (caused by biomedical factors) and  
609 non-hospital diseases (caused by social-cultural factors). Diseases that exhibited  
610 abnormal symptoms, which are often common with highly infectious diseases e.g.  
611 hemorrhagic fevers were associated with customs and beliefs such as witchcraft,  
612 repercussions of sins and deviance from societal and cultural expectations. These  
613 observations are not new though, but had already characterized community interactions  
614 with other communicable diseases such HIV/AIDS (Odiwuor 2004; Ayikukwei et al. 2008),  
615 measles (Ouko 1998; Geissler 1998) and Schistosomiasis (Kangunyu 1997; Musuva et



616 al. 2014) in western Kenya. It has taken great efforts of health education initiatives to  
617 change the cultural perceptions communities towards the causes of the diseases.

618 The dual disease etiology has affected community health-seeking behaviours, where they  
619 first seek intervention of traditional and religious healers for diseases believed to be  
620 occurring from socio-cultural causes. The practice in turn can delay appropriate  
621 management measures including diagnosis, isolation and treatment, leading to faster and  
622 wider spread of the disease and greater symptom severity for patients, especially for  
623 highly infectious diseases (see for example Awah et al 2015, for Ebola spread in West  
624 Africa).

625 Cultural beliefs about how diseases is caused forms a loop with the disease in the manner  
626 in which they influence health-seeking behaviours. Non-hospital diseases were believed  
627 to be only treatable by traditional or religious healers. Interviews indicated that it was  
628 highly possible for communities to consider some highly infectious diseases as non-  
629 hospital (especially those that people are unfamiliar with). This makes the traditional and  
630 religious healers potential first line caregivers in times of outbreak of highly infectious  
631 diseases. DeVries and others (2016) have made similar conclusions from their work on  
632 community experiences with the Ebola outbreak in Uganda, where they observed that  
633 traditional healing places were amongst the first mile epidemic spaces because they were  
634 the first to try to treat patients. Prioritizing traditional and religious health-seeking in times  
635 of outbreak of highly infectious diseases will most likely delay appropriate treatment and  
636 compromise preventive response. That is, patients will only get to the formal health  
637 facilities when they are already too sick to be helped with ease and at low costs, and after  
638 they have spread the diseases to their handlers at the traditional healing places.

639 Preferences to traditional healers were rationalized through beliefs that the causes of  
640 those diseases are shaped by sociocultural factors and previous dissatisfaction with  
641 conventional medicine. Haque et. al. (2016), for example, suggests that the values that  
642 people derive from religious and cultural beliefs are also associated with lower trust in  
643 conventional medicine that could increase fear, which consequently lead to a more  
644 conspiratorial thinking and reduced willingness to take protective measures. For example,  
645 it was reported that some women believed that injection treatment given to children with  
646 measles at clinics prevent rashes related to the disease to appear on the body, leading  
647 children to die of a treatable disease. The findings here further explain the gaps in the  
648 knowledge of both the healer and those seeking healing in a context where measles itself  
649 is already viewed as a disease caused by sociocultural factors. This finding illuminates a  
650 need for a culturally centered health education to enhance the uptake or choice of the  
651 available interventions, especially for highly infectious diseases.

652 A further looping effect happens through the healing practices employed by the traditional  
653 and religious healers (Alwala, 2020). These healing practices were found to be  
654 predisposing healers, their families and their patients to increased risk of infections due  
655 to lack of protective gears and limited knowledge and capacity to handle patient's wastes.  
656 Lack of personal protection was especially associated with inability to afford, but also the  
657 need to enhance trust and faith in the healer. Altogether, these practices increased  
658 chances of disease spreading to the healers and many patients seeking their healing  
659 services, as have been recorded in West Africa (Alexander et al., 2015; Falade, 2016;  
660 Richards et al., 2020) and Uganda (LaBrunda and Amin, 2020). Despite the challenges,  
661 popularity of these healing practices shows no decline since they are generally passed

662 from one generation to another (Haque et al., 2016). Being the first contact people in  
663 cases of a disease outbreak, we concur with De Vries and others that interventions for  
664 highly infectious diseases like EVD should therefore not ignore, stigmatize or undermine  
665 these informal caregivers as they play a central role in the first mile strategies (De Vries  
666 et al., 2016). To achieve this goal, we contend with the argument that public health  
667 communication and education on highly infectious diseases e.g. EVD should be holistic  
668 in a manner that takes into consideration the sociocultural aspects (Manderson 1998;  
669 Sastry and Dutta 2017). We contend with Hussen et al. (2020) on the need for cultural  
670 competency in designing health communication and education programs for highly  
671 infectious diseases.

672 To conclude, we recast the argument that recognizing the looping effects of beliefs and  
673 how they interact with management of highly infectious diseases and need to develop a  
674 transdisciplinary approach to management of infectious disease (Parkes et., 2005). We  
675 suggest that it is advisable to meet the challenges posed by highly infectious diseases in  
676 a holistic manner because socioeconomic and cultural factors are deeply enmeshed with  
677 outbreaks of those diseases (Phua 2015). We make the following recommendations to  
678 this end:-

- 679 1. There is a need for public health education and awareness on the various  
680 highly infectious diseases e.g. hemorrhagic fevers, acute infectious  
681 respiratory diseases etc. in western Kenya and similar contexts.
- 682 2. Public health communication and education on highly infectious diseases  
683 should be culturally-centered and consider the existing disease etiologies  
684 within communities.

- 685           3. Agencies and public health professionals responding to outbreaks of highly  
686           infectious diseases should acquire cultural competencies about the  
687           contexts that they seek to respond in.
- 688           4. There is need for formulation and implementation of policies and practices  
689           to integrate alternative healing actors e.g. traditional and religious healers  
690           into the formal healthcare.

691 **References**

692 Adu-Gyamfi, S., & Anderson, E. (2019). Indigenous medicine and traditional healing in  
693 Africa: a systematic synthesis of the literature. *Philosophy, Social and Human Disciplines*,  
694 1, 69-100.

695 Airhihenbuwa, C. O., Ford, C. L., & Iwelunmor, J. I. (2014). Why culture matters in health  
696 interventions: lessons from HIV/AIDS stigma and NCDs. *Health Education & Behavior*,  
697 41(1), 78-84.

698 Alexander, K. A., Sanderson, C. E., Marathe, M., Lewis, B. L., Rivers, C. M., Shaman, J.,  
699 & Eubank, S. (2015). What factors might have led to the emergence of Ebola in West  
700 Africa?. *PLoS neglected tropical diseases*, 9(6), e0003652.

701 Alwala, B. (2020). What has science to do with religion? A looming challenge of traditional  
702 and religious practices on curbing the spread of COVID-19 pandemic in Kenya. *East  
703 African Journal of Traditions, Culture and Religion*, 2(1), 23-33.

704 Awah, P. K., Boock, A. U., & Kum, K. A. (2015). Ebola Virus Diseases in Africa: a  
705 commentary on its history, local and global context. *The Pan African Medical Journal*,  
706 22(Suppl 1).

707 Ayikukwei, R., Ngare, D., Sidle, J., Ayuku, D., Baliddawa, J., & Greene, J. (2008).  
708 HIV/AIDS and cultural practices in western Kenya: the impact of sexual cleansing rituals  
709 on sexual behaviours. *Culture, health & sexuality*, 10(6), 587-599.

710 Balde, A. (2016). *How elements of culture have contributed to the construction of health  
711 meanings in regards to the 2014 Ebola outbreak* (Doctoral dissertation).

712 Bayeh, R., Yampolsky, M. A., & Ryder, A. G. (2021). The social lives of infectious  
713 diseases: Why culture matters to COVID-19. *Frontiers in Psychology, 12*, 648086.

714 Boahen, O., Owusu-Agyei, S., Febir, L. G., Tawiah, C., Tawiah, T., Afari, S., & Newton,  
715 S. (2013). Community perception and beliefs about blood draw for clinical research in  
716 Ghana. *Transactions of The Royal Society of Tropical Medicine and Hygiene, 107*(4),  
717 261-265.

718 Borg, M. A. (2014). Cultural determinants of infection control behaviour: understanding  
719 drivers and implementing effective change. *Journal of Hospital Infection, 86*(3), 161-168.

720 Buckee, C., Noor, A., and Sattenspiel, L. (2021). Thinking clearly about social aspects of  
721 infectious disease transmission. *Nature, 595*(7866), 205-213.

722 Chebii, W. K., Muthee, J. K., & Kiemo, K. (2020). The governance of traditional medicine  
723 and herbal remedies in the selected local markets of Western Kenya. *Journal of*  
724 *ethnobiology and ethnomedicine, 16*(1), 1-24.

725 De-Vries, D. H, Rwemisisi, J. T., Musinguzi, L. K., Benoni, T. E., Muhangi, D., Groot, M.  
726 D. & Pool, R. (2016). The first mile: community experience of outbreak control during an  
727 Ebola outbreak in Luwero district, Uganda.

728 Geissler, P. W. (1998). 'Worms are our life', part I: understandings of worms and the body  
729 among the Luo of western Kenya. *Anthropology & Medicine, 5*(1), 63-79.

730 Geissler, P. W. (2005). 'Kachinja are coming!': encounters around medical research work  
731 in a Kenyan village. *Africa, 75*(2), 173-202.

732 Hacking, I. (1995). The looping effects of human kinds. In D. Sperber, D. Premack, & A.  
733 J. Premack (Eds.), *Causal cognition: A multidisciplinary debate* (pp. 351–394). Clarendon  
734 Press/Oxford University Press.

735 Hacking, I. (2007). Kinds of people: Moving targets. In *Proceedings-British Academy* (Vol.  
736 151, p. 285). Oxford University Press Inc..

737 Harrison, I. E., & Airhihenbuwa, C. O. (1993). Traditional medicine in Africa: Past, present,  
738 and future. *Health and health care in developing countries: Sociological perspectives*,  
739 122-34.

740 Haque, M. I., Chowdhury, A. A., Shahjahan, M., & Harun, M. G. D. (2018). Traditional  
741 healing practices in rural Bangladesh: a qualitative investigation. *BMC complementary  
742 and alternative medicine*, 18, 1-15.

743 Hussen, S. A., Kuppalli, K., Castillo-Mancilla, J., Bedimo, R., Fadul, N., & Ofotokun, I.  
744 (2020). Cultural competence and humility in infectious diseases clinical practice and  
745 research. *The Journal of infectious diseases*, 222(Supplement\_6), S535-S542.

746 Jones, J. (2011). Ebola, emerging: The limitations of culturalist discourses in  
747 epidemiology. *The Columbia University Journal of Global Health*, 1(1), 1-6.

748 Kagunyu, A. W. (1997). *Perceptions of haematuria among the Luo of" Bondo division, Siaya  
749 district, kenya"* (Doctoral dissertation).

750 Kafiriri, L., & Ross, A. (2020). The politics of disease epidemics: a comparative analysis  
751 of the SARS, Zika, and Ebola outbreaks. *Global Social Welfare*, 7(1), 33-45.

752 Kinsman, J. (2012). "A time of fear": local, national, and international responses to a large  
753 Ebola outbreak in Uganda. *Globalization and health*, 8, 1-12.

754 Kirmayer, L. J., & Sartorius, N. (2007). Cultural models and somatic syndromes.  
755 *Psychosomatic medicine*, 69(9), 832-840.

756 Kozlov, M. (2022). Ebola outbreak in Uganda: how worried are researchers?. *Nature*.

757 Kwanya, T. (2020). Stigmatisation of indigenous knowledge: The case of night-running in  
758 western Kenya. *Journal of Religion in Africa*, 48(4), 376-392.

759 LaBrunda, Michelle, and Naushad Amin. "The emerging threat of Ebola." *Global Health*  
760 *Security: Recognizing Vulnerabilities, Creating Opportunities* (2020): 103-139.

761 Lucy, M., David, B., Lydia, A., Janet, K., & Patricia, K. (2022). Cultural practices resilience  
762 in the wake of COVID-19 among communities in Western Kenya.

763 Manderson, L. (1998). Applying medical anthropology in the control of infectious disease.  
764 *Tropical Medicine & International Health*, 3(12), 1020-1027.

765 Manson, S. M. (2020). The role of culture in effective intervention design, implementation,  
766 and research: Its universal importance. *Prevention Science*, 21(Suppl 1), 93-97.

767 Mbuthia, G. W., Olungah, C. O., & Ondicho, T. G. (2018). Health-seeking pathway and  
768 factors leading to delays in tuberculosis diagnosis in West Pokot County, Kenya: A  
769 grounded theory study. *PloS one*, 13(11), e0207995



770 McMichael, A. J. (2004). Environmental and social influences on emerging infectious  
771 diseases: past, present and future. *Philosophical Transactions of the Royal Society of*  
772 *London. Series B: Biological Sciences*, 359(1447), 1049-1058.

773 Musuva, R. M., Awiti, A., Omedo, M., Ogutu, M., Secor, W. E., Montgomery, S. P., ... &  
774 Mwinzi, P. N. (2014). Community knowledge, attitudes and practices on schistosomiasis  
775 in western Kenya-the SCORE Project. *The American journal of tropical medicine and hygiene*,  
776 90(4), 646.

777 Odiwuor, W. H. (2004). Indigenous Knowledge and Beliefs Among the Luo in Kenya: A  
778 Critical Inquiry into Family Life Education in the Prevention of HIV/AIDS. *Inquiry: Critical*  
779 *Thinking Across the Disciplines*, 23(4), 19-24.

780 Oey, E., & Rahardjo, B.S. (2021). Does culture influence our ways in handling COVID-  
781 19?. *International Journal of Sociology and Social Policy*, 41(11/12), 1149-1169.

782 Okafor, S. O., Jennifer, O. E., Nwokoma, U. B., Chuke, N. U., & Onah, S. O. (2022).  
783 Indigenous health systems and the management of infectious diseases: A study of the  
784 emergence of the COVID-19 pandemic among the Igbo of southeast Nigeria. In  
785 *Indigenous Health and Well-Being in the COVID-19 Pandemic* (pp. 110-129). Routledge.

786 Otieno, O. S., & Onyango, W. P. (2018). Influence of Socio-Culture on the Empowerment  
787 of Persons with Disabilities In Rachuonyo South-Homa-Bay County, Kenya. *IOSR Journal*  
788 *of Humanities & Social Science*, 23(8), 81-103.

789 Ouko, S. A. (1998). *The influence of socio-cultural and economic factors on health seeking*  
790 *behaviour: the case of measles in children in rarieda division, siaya district'* (Doctoral dissertation,  
791 University of Nairobi).

792 Park, C. (2020). Traditional funeral and burial rituals and Ebola outbreaks in West Africa:  
793 a narrative review of causes and strategy interventions. *Journal of Health and Social*  
794 *Sciences*, 5(1), 073.

795 Parkes, M. W., Bienen, L., Breilh, J., Hsu, L. N., McDonald, M., Patz, J. A., ... & Yassi, A.  
796 (2005). All hands on deck: transdisciplinary approaches to emerging infectious disease.  
797 *EcoHealth*, 2, 258-272.

798 Phua, K. L. (2015). Meeting the challenge of Ebola virus disease in a holistic manner by  
799 taking into account socioeconomic and cultural factors: the experience of West Africa.  
800 *Infectious Diseases: Research and Treatment*, 8, IDRT-S31568.

801 Richards, P., Mokuwa, G. A., Vandi, A., Mayhew, S. H., & Ebola Gbalo Research Team.  
802 (2020). Re-analysing Ebola spread in Sierra Leone: the importance of local social  
803 dynamics. *PloS one*, 15(11), e0234823

804 Rodriguez-Dod, E. C., Marty, A. M., & Marty-Nelson, E. M. (2016). Tears in heaven:  
805 Religiously and culturally sensitive laws for preventing the next pandemic. *Cath. UL Rev.*,  
806 66, 117.

807 Ryder, A. G., & Chentsova-Dutton, Y. E. (2015). 16 Cultural-Clinical Psychology. *Re-*  
808 *Visioning Psychiatry: Cultural Phenomenology, Critical Neuroscience, and Global Mental*  
809 *Health*, 400.

810 Sastry, S., & Dutta, M. J. (2017). Health communication in the time of Ebola: A culture-  
811 centered interrogation. *Journal of health communication*, 22(sup1), 10-14.

812 Schaller, M., & Murray, D. R. (2010). Infectious diseases and the evolution of cross-  
813 cultural differences. *Evolution, culture, and the human mind*, 243-56.

814 Schiavo, R. (2013). *Health communication: From theory to practice* (Vol. 217). John Wiley  
815 & Sons.

816 Shultz, J. M., Cooper, J. L., Baingana, F., Oquendo, M. A., Espinel, Z., Althouse, B. M., .  
817 & Rechkemmer, A. (2016). The role of fear-related behaviors in the 2013–2016 West  
818 Africa Ebola virus disease outbreak. *Current psychiatry reports*, 18, 1-14.

819 Victor, G. S., & Ahmed, S. (2019). The importance of culture in managing mental health  
820 response to pandemics. *Psychiatry of pandemics: A mental health response to infection*  
821 *outbreak*, 55-64.

822 Wonnah, S. Z. (2018). *Myths, Risks, and Ignorance: Western Media and Health Experts'*  
823 *Representations of Cultures in Ebola-Affected West African Communities* (Doctoral  
824 dissertation, East Tennessee State University).

825 World Health Organization. (2013). *WHO traditional medicine strategy: 2014-2023*. World  
826 Health Organization.

827

828 **Acknowledgments**

829 First, we convey our heartfelt thanks and gratitude to all participants who provided the  
830 data and information from which this article draws its analysis and conclusions. These  
831 participants include, religious healers, traditional healers, patients of both the healers,  
832 participants of participatory workshops (chiefs, community health promoters, public health  
833 officers and police officers from Homabay, Bungoma and West Pokot counties).

834 We thank the Kenya Red Cross Society staff for their outstanding contribution in ensuring  
835 successful implementation and conclusion of this assignment. Special thanks to  
836 Ms.Sharon Ayodi, Mr. Samwel Omondi, Ms. Scholastica Jelangat and Ms. Margaret  
837 Achieng for their valuable support and logistical coordination through this activity.
